# Supplementary material
Source: Springer Nature journal article supplement (http://springerprofessional.de/resource/supplementary/40702_2023_963_MOESM1_ESM.pdf/25191308)
Supplement: MOESM1 [file 25191308]

**Organisatorische Maßnahmen**

|                             | Empirisch (E)<br>Konzeptionell (K) | Pausen während und zwischen Meetings | Kamera deaktivieren/reine Audiokonferenzen | Interaktion durch Feedback, Reaktionen und Methodenwechsel | Beschränkung der Meetingdauer | Maßnahmen für Gesundheit und Wohlbefinden | ausreichendes technisches Equipment und Infrastruktur | Reduktion der Meetinganzahl | Moderation, Organisation und Management der Meetings | Alternative Kommunikationsmittel | Verbesserung der VC-Fähigkeiten | Zeitpunkt des Meetings | Gruppenregeln | ausreichend Zeit zur Vorbereitung | Beachtung der Teilnehmerzahl |
|-----------------------------|------------------------------------|--------------------------------------|--------------------------------------------|------------------------------------------------------------|-------------------------------|-------------------------------------------|-------------------------------------------------------|-----------------------------|------------------------------------------------------|----------------------------------|---------------------------------|------------------------|---------------|-----------------------------------|------------------------------|
| Amponsah et al. (2021)      | E                                  |                                      |                                            |                                                            | x                             |                                           |                                                       |                             | x                                                    |                                  |                                 |                        |               |                                   |                              |
| Asgari et al. (2021)        | E                                  | x                                    |                                            |                                                            | x                             |                                           |                                                       |                             |                                                      |                                  |                                 |                        |               |                                   |                              |
| Bailenson (2021)            | K                                  |                                      | x                                          |                                                            |                               |                                           | x                                                     |                             |                                                      | x                                |                                 |                        |               |                                   |                              |
| Bayindir/Gökçe (2022)       | E                                  | x                                    |                                            |                                                            | x                             |                                           | x                                                     |                             |                                                      |                                  | x                               |                        |               |                                   |                              |
| Bennett et al. (2021)       | E                                  | x                                    | x                                          |                                                            |                               |                                           |                                                       |                             |                                                      |                                  |                                 | x                      | x             |                                   |                              |
| Brown (2022)                | K                                  | x                                    | x                                          |                                                            |                               |                                           |                                                       |                             |                                                      | x                                |                                 |                        |               |                                   |                              |
| Brown Epstein (2020)        | K                                  | x                                    | x                                          | x                                                          |                               |                                           | x                                                     | x                           | x                                                    | x                                | x                               |                        |               |                                   |                              |
| Bullock et al. (2021)       | K                                  | x                                    |                                            |                                                            |                               | x                                         | x                                                     |                             |                                                      |                                  | x                               |                        |               |                                   |                              |
| Chawla (2021)               | E                                  | x                                    |                                            |                                                            |                               |                                           |                                                       |                             |                                                      |                                  |                                 |                        |               |                                   |                              |
| Collins (2020)              | K                                  |                                      | x                                          |                                                            |                               |                                           |                                                       |                             |                                                      |                                  |                                 |                        |               |                                   |                              |
| (2022)                      | E                                  |                                      |                                            | x                                                          |                               |                                           |                                                       |                             |                                                      |                                  |                                 |                        |               |                                   |                              |
| Döring et al. (2022)        | K                                  | x                                    |                                            | x                                                          | x                             | x                                         | x                                                     |                             | x                                                    |                                  | x                               |                        | x             |                                   |                              |
| Ebner/Greenberg (2020)      | K                                  | x                                    | x                                          | x                                                          |                               |                                           |                                                       |                             |                                                      |                                  |                                 |                        |               |                                   |                              |
| Hall (2020)                 | K                                  |                                      |                                            | x                                                          |                               | x                                         |                                                       |                             |                                                      |                                  |                                 |                        |               |                                   |                              |
| Hopf/Berger (2022)          | E                                  | x                                    | x                                          |                                                            | x                             | x                                         |                                                       |                             |                                                      |                                  |                                 |                        |               |                                   |                              |
| Johns et al. (2021)         |                                    |                                      |                                            |                                                            |                               |                                           |                                                       |                             |                                                      |                                  |                                 |                        |               |                                   |                              |
| Kushner (2021)              |                                    |                                      |                                            |                                                            |                               |                                           |                                                       |                             |                                                      |                                  |                                 |                        |               |                                   |                              |
| Mamtani et al. (2021)       | K                                  | x                                    | x                                          |                                                            |                               |                                           |                                                       | x                           |                                                      |                                  |                                 | x                      |               | x                                 |                              |
| Massner (2021)              | E                                  | x                                    |                                            | x                                                          |                               |                                           |                                                       | x                           |                                                      |                                  |                                 |                        |               |                                   |                              |
| Mutu et al. (2021)          | K                                  | x                                    | x                                          |                                                            |                               |                                           |                                                       | x                           |                                                      | x                                |                                 |                        |               |                                   |                              |
| Nesher Shoshan/Wehrt (2021) | E                                  |                                      |                                            |                                                            |                               |                                           | x                                                     |                             | x                                                    |                                  |                                 |                        |               |                                   |                              |
| Ngien/Hogan (2022)          | E                                  | x                                    |                                            |                                                            | x                             | x                                         |                                                       |                             |                                                      |                                  |                                 |                        |               |                                   |                              |
| Nurismawan et al. (2022)    |                                    |                                      |                                            |                                                            |                               |                                           |                                                       |                             |                                                      |                                  |                                 |                        |               |                                   |                              |
| Peper et al. (2021)         | E                                  |                                      |                                            | x                                                          |                               |                                           |                                                       |                             |                                                      |                                  |                                 |                        |               |                                   |                              |
| Ratan et al. (2021)         | E                                  |                                      |                                            |                                                            |                               |                                           |                                                       |                             | x                                                    |                                  |                                 |                        |               |                                   |                              |
| Riedl (2022)                | K                                  | x                                    | x                                          | x                                                          | x                             |                                           | x                                                     | x                           |                                                      | x                                | x                               |                        |               |                                   | x                            |
| Rößler et al. (2021)        | E                                  |                                      |                                            | x                                                          |                               |                                           |                                                       |                             | x                                                    |                                  |                                 |                        |               |                                   |                              |
| Rump/Brandt (2020)          | E                                  | x                                    |                                            |                                                            | x                             |                                           |                                                       |                             | x                                                    |                                  |                                 |                        |               |                                   |                              |
| Salim et al. (2022)         | E                                  | x                                    |                                            |                                                            | x                             | x                                         |                                                       |                             |                                                      |                                  |                                 |                        |               |                                   |                              |
| Salsabila et al. (2021)     | E                                  |                                      |                                            | x                                                          |                               |                                           |                                                       |                             |                                                      |                                  |                                 |                        |               |                                   |                              |
| Shklarski et al. (2021)     | E                                  | x                                    |                                            |                                                            |                               | x                                         |                                                       |                             |                                                      |                                  |                                 | x                      |               |                                   |                              |
| Shockley et al. (2021)      | E                                  |                                      | x                                          |                                                            |                               |                                           |                                                       |                             |                                                      |                                  |                                 |                        |               |                                   |                              |
| Tobing et al. (2022)        | E                                  |                                      |                                            |                                                            |                               | x                                         |                                                       |                             |                                                      |                                  |                                 |                        |               |                                   |                              |
| Toney et al. (2021)         | E                                  |                                      |                                            | x                                                          |                               |                                           |                                                       |                             |                                                      |                                  |                                 |                        |               |                                   | x                            |
| Usta Kara/Ersoy (2022)      | E                                  | x                                    |                                            |                                                            | x                             | x                                         | x                                                     |                             |                                                      |                                  | x                               |                        |               |                                   |                              |
| Wicks (2021)                | K                                  | x                                    |                                            |                                                            |                               |                                           |                                                       | x                           |                                                      | x                                |                                 |                        |               |                                   |                              |
| Wiederhold (2020)           | K                                  | x                                    | x                                          |                                                            |                               |                                           |                                                       | x                           |                                                      |                                  |                                 |                        |               |                                   |                              |
| <b>Summe</b>                |                                    | 21                                   | 12                                         | 11                                                         | 10                            | 9                                         | 8                                                     | 7                           | 6                                                    | 6                                | 6                               | 3                      | 2             | 2                                 | 1                            |

**Persönliche Maßnahmen**

|                             | Empirisch (E)<br>Konzeptionell (K) | Vermeidung von Multitasking | Bewegung | Blick direkt in die Kamera | Vermeidung von Ablenkungen und Unterbrechungen | Adaptierung des Arbeitsplatzes | Deaktivierung der Selbstansicht | Blick vom Monitor abwenden | Psychologische und soziale Unterstützung | Verwendung der Stummschaltung | frühzeitiger Login | Trennung beruflicher und privater Themen | Verbesserung der zwischenmenschlichen Beziehungen und Gruppenzugehörigkeit | Notizen mit Papier und Stift |
|-----------------------------|------------------------------------|-----------------------------|----------|----------------------------|------------------------------------------------|--------------------------------|---------------------------------|----------------------------|------------------------------------------|-------------------------------|--------------------|------------------------------------------|----------------------------------------------------------------------------|------------------------------|
| Amponsah et al. (2021)      | E                                  |                             |          |                            | x                                              |                                |                                 |                            |                                          |                               |                    |                                          |                                                                            |                              |
| Asgari et al. (2021)        |                                    |                             |          |                            |                                                |                                |                                 |                            |                                          |                               |                    |                                          |                                                                            |                              |
| Bailenson (2021)            | K                                  |                             |          |                            |                                                |                                | x                               |                            |                                          |                               |                    |                                          |                                                                            |                              |
| Bayindir/Gökce (2022)       | E                                  |                             | x        |                            |                                                |                                |                                 |                            |                                          |                               |                    |                                          |                                                                            |                              |
| Bennett et al. (2021)       | E                                  |                             | x        |                            |                                                |                                | x                               |                            |                                          | x                             |                    |                                          | x                                                                          |                              |
| Brown (2022)                | K                                  | x                           |          |                            | x                                              |                                | x                               |                            |                                          |                               |                    |                                          |                                                                            |                              |
| Brown Epstein (2020)        | K                                  | x                           | x        | x                          | x                                              | x                              |                                 |                            |                                          | x                             | x                  |                                          |                                                                            |                              |
| Bullock et al. (2021)       | K                                  | x                           |          |                            | x                                              | x                              |                                 | x                          | x                                        |                               |                    | x                                        |                                                                            |                              |
| Chawla (2021)               |                                    |                             |          |                            |                                                |                                |                                 |                            |                                          |                               |                    |                                          |                                                                            |                              |
| Collins (2020)              |                                    |                             |          |                            |                                                |                                |                                 |                            |                                          |                               |                    |                                          |                                                                            |                              |
| (2022)                      |                                    |                             |          |                            |                                                |                                |                                 |                            |                                          |                               |                    |                                          |                                                                            |                              |
| Döring et al. (2022)        | K                                  | x                           |          |                            |                                                |                                |                                 |                            |                                          |                               |                    | x                                        | x                                                                          |                              |
| Ebner/Greenberg (2020)      | K                                  |                             |          |                            |                                                |                                |                                 | x                          |                                          |                               |                    |                                          |                                                                            |                              |
| Hall (2020)                 | K                                  |                             |          |                            |                                                |                                |                                 | x                          |                                          |                               |                    |                                          |                                                                            | x                            |
| Hopf/Berger (2022)          | E                                  |                             | x        |                            |                                                |                                |                                 |                            |                                          |                               |                    |                                          |                                                                            |                              |
| Johns et al. (2021)         | E                                  | x                           |          |                            |                                                |                                |                                 |                            |                                          |                               |                    |                                          |                                                                            |                              |
| Kushner (2021)              | E                                  |                             |          | x                          |                                                |                                |                                 |                            |                                          |                               |                    |                                          |                                                                            |                              |
| Mamtani et al. (2021)       | K                                  | x                           |          | x                          |                                                |                                | x                               |                            |                                          |                               |                    |                                          |                                                                            |                              |
| Massner (2021)              | E                                  |                             |          |                            | x                                              |                                |                                 |                            |                                          |                               |                    |                                          |                                                                            |                              |
| Mutu et al. (2021)          | K                                  | x                           |          |                            |                                                |                                | x                               |                            |                                          |                               |                    |                                          |                                                                            |                              |
| Nesher Shoshan/Wehrt (2021) | E                                  |                             |          |                            |                                                |                                |                                 |                            |                                          |                               |                    |                                          |                                                                            |                              |
| Ngien/Hogan (2022)          | E                                  | x                           |          |                            |                                                |                                |                                 |                            | x                                        |                               |                    |                                          |                                                                            |                              |
| Nurismawan et al. (2022)    | K                                  |                             |          |                            |                                                |                                |                                 |                            | x                                        |                               |                    |                                          |                                                                            |                              |
| Peper et al. (2021)         | E                                  |                             | x        | x                          | x                                              | x                              |                                 | x                          |                                          |                               |                    |                                          |                                                                            |                              |
| Ratan et al. (2021)         | E                                  |                             |          |                            |                                                |                                | x                               |                            |                                          |                               |                    |                                          |                                                                            |                              |
| Riedl (2022)                | K                                  | x                           | x        |                            |                                                | x                              |                                 |                            |                                          | x                             | x                  |                                          |                                                                            |                              |
| Rößler et al. (2021)        |                                    |                             |          |                            |                                                |                                |                                 |                            |                                          |                               |                    |                                          |                                                                            |                              |
| Rump/Brandt (2020)          | E                                  |                             |          |                            |                                                |                                |                                 |                            |                                          |                               |                    |                                          |                                                                            |                              |
| Salim et al. (2022)         |                                    |                             |          |                            |                                                |                                |                                 |                            |                                          |                               |                    |                                          |                                                                            |                              |
| Salsabila et al. (2021)     | E                                  |                             | x        |                            |                                                |                                |                                 |                            |                                          |                               |                    |                                          |                                                                            |                              |
| Shklarski et al. (2021)     | E                                  |                             | x        |                            |                                                |                                |                                 |                            | x                                        |                               |                    |                                          |                                                                            |                              |
| Shockley et al. (2021)      |                                    |                             |          |                            |                                                |                                |                                 |                            |                                          |                               |                    |                                          |                                                                            |                              |
| Tobing et al. (2022)        |                                    |                             |          |                            |                                                |                                |                                 |                            |                                          |                               |                    |                                          |                                                                            |                              |
| Toney et al. (2021)         |                                    |                             |          |                            |                                                |                                |                                 |                            |                                          |                               |                    |                                          |                                                                            |                              |
| Usta Kara/Ersoy (2022)      | E                                  | x                           | x        | x                          |                                                | x                              |                                 | x                          | x                                        |                               |                    |                                          |                                                                            |                              |
| Wicks (2021)                | K                                  | x                           |          | x                          | x                                              |                                |                                 |                            |                                          |                               |                    |                                          |                                                                            |                              |
| Wiederhold (2020)           | K                                  | x                           |          | x                          |                                                | x                              |                                 |                            |                                          | x                             |                    |                                          |                                                                            |                              |
| <b>Summe</b>                |                                    | 12                          | 9        | 7                          | 7                                              | 6                              | 6                               | 5                          | 5                                        | 4                             | 2                  | 2                                        | 2                                                                          | 1                            |

### Technologische Maßnahmen

|                                           | Empirisch (E)<br>Konzeptionell (K) | Avatar, VR, AR und Telepräsenzroboter | Benutzung des "together mode" | Verwendung von Tools, die die Blickrichtung der Teilnehmer:innen korrigieren | Verkleinerung des Desktopfensters |
|-------------------------------------------|------------------------------------|---------------------------------------|-------------------------------|------------------------------------------------------------------------------|-----------------------------------|
| Amponsah et al. (2021)                    | E                                  |                                       |                               |                                                                              |                                   |
| Asgari et al. (2021)                      | E                                  |                                       |                               |                                                                              |                                   |
| Bailenson (2021)                          | K                                  |                                       |                               |                                                                              |                                   |
| Bayindir/Gökce (2022)                     | E                                  |                                       |                               |                                                                              |                                   |
| Bennett et al. (2021)                     | E                                  |                                       |                               |                                                                              |                                   |
| Brown (2022)                              | K                                  |                                       |                               |                                                                              |                                   |
| Brown Epstein (2020)                      | K                                  | x                                     | x                             |                                                                              | x                                 |
| Bullock et al. (2021)                     | K                                  |                                       |                               |                                                                              |                                   |
| Chawla (2021)                             | E                                  |                                       |                               |                                                                              |                                   |
| Collins (2020)                            | K                                  |                                       |                               |                                                                              |                                   |
| de Oliveira Kubrusly Sobral et al. (2022) | E                                  |                                       |                               |                                                                              |                                   |
| Döring et al. (2022)                      | K                                  |                                       |                               |                                                                              |                                   |
| Ebner/Greenberg (2020)                    | K                                  |                                       |                               |                                                                              |                                   |
| Hall (2020)                               | K                                  |                                       |                               |                                                                              |                                   |
| Hopf/Berger (2022)                        | E                                  |                                       |                               |                                                                              |                                   |
| Johns et al. (2021)                       |                                    |                                       |                               |                                                                              |                                   |
| Kushner (2021)                            |                                    |                                       |                               |                                                                              |                                   |
| Mamtani et al. (2021)                     | K                                  |                                       |                               |                                                                              |                                   |
| Massner (2021)                            | E                                  |                                       |                               |                                                                              |                                   |
| Mutu et al. (2021)                        | K                                  |                                       |                               |                                                                              |                                   |
| Nesher Shoshan/Wehrt (2021)               | E                                  |                                       |                               |                                                                              |                                   |
| Ngien/Hogan (2022)                        | E                                  |                                       |                               |                                                                              |                                   |
| Nurismawan et al. (2022)                  |                                    |                                       |                               |                                                                              |                                   |
| Peper et al. (2021)                       | E                                  |                                       |                               |                                                                              |                                   |
| Ratan et al. (2021)                       | E                                  | x                                     |                               |                                                                              |                                   |
| Riedl (2022)                              | K                                  | x                                     | x                             | x                                                                            |                                   |
| Rößler et al. (2021)                      | E                                  |                                       |                               |                                                                              |                                   |
| Rump/Brandt (2020)                        | E                                  |                                       | x                             | x                                                                            |                                   |
| Salim et al. (2022)                       | E                                  |                                       |                               |                                                                              |                                   |
| Salsabila et al. (2021)                   | E                                  |                                       |                               |                                                                              |                                   |
| Shklarski et al. (2021)                   | E                                  |                                       |                               |                                                                              |                                   |
| Shockley et al. (2021)                    | E                                  |                                       |                               |                                                                              |                                   |
| Tobing et al. (2022)                      | E                                  |                                       |                               |                                                                              |                                   |
| Toney et al. (2021)                       | E                                  |                                       |                               |                                                                              |                                   |
| Usta Kara/Ersoy (2022)                    | E                                  |                                       |                               |                                                                              |                                   |
| Wicks (2021)                              | K                                  | x                                     |                               |                                                                              |                                   |
| Wiederhold (2020)                         | K                                  | x                                     |                               |                                                                              |                                   |
| <b>Summe</b>                              |                                    | 5                                     | 3                             | 2                                                                            | 1                                 |
